# Supplementary material for: Plasma Levels of Acyl-Carnitines and Carboxylic Acids Correlate With Cardiovascular and Kidney Function in Subjects With Sickle Cell Trait
Source: Front Physiol. 2022 Jul 13;13:916197. doi: 10.3389/fphys.2022.916197 (PMC9326174; doi:10.3389/fphys.2022.916197)
Supplement: Supplementary file 3 [file Table1.XLSX]

## Sheet: 04 - Supplementary Table 1 - Me
Supplementary Table 1 - Metabolomics data and clinical covariates
	Group	11.25 S-1 mPas-1	22.5 S-1 mPas-1	225 S-1 mPas-1	375 S-1mPas-1	45 S-1 mPas-1	5.62 S-1 mPas-1	90 S-1 mPas-1	Hb g/100 ml	375 S-1mPas-1	AGE ajusted cohort Mor	AGEs umol/L	AOPP Advanced Oxidation Protein Products ?mol/L	AOPP Advanced Oxidation Protein Products umol/L	aortic distensibility	Augmentation Index	Average BP	BMI	Carotid radial PWV	Carotid-femoral PWV	Catalase umol/L	CKD-EPI DFG estimation mL/min/1,73m2 CKD-EPI	Diastolic BP	erythrocytes Millions/mm3	Fasting Blood Glucose mg/dL	FRAP umol/L	Fructosamine umol/L	GPX umol/L	HbA1C	HbA1C mmol/mol	HbS	Hct	Hct - HmG	HDL-cholesterol mmol/l	Heart Rate	Height cm	IL-1b ng/mL	In menopause since	LDL- cholesterol mmol/l	Leucocytes /mm3x1000	Malondialdehyde MDA umol/L	MCHC g/dl	MCHV pg	MCV 3	Microalbuminuria mg/L	Nitrotyrosine umol/L	PAD mmHg repos 1	PAS mmHg repos 1	PAS mmHg repos 2
249	Control	11.01	9.21	6.05	5.3	8.01	11.84	6.75	12.6	1.96	1.59835	1.61596	15.78	20.0665	0.123076	5	89.3333	24.093	6.2	7.2	7.61881	93.64	72	4.7	100	589.757	263	71.1184	5.5	37	0	36.8	38	0.67	60	168	0		0.59	6.19	1.83644	28.1	24.1	75.5	18	8.86276	0	124	0
250	Control	10.6	9.5	6.48	5.63	8.43	11.43	7.35	11.7	1.85	1.61472	1.63251	14.87	8.96634	0.0815821	-11	81	19.9481	8.1	8.4	7.09131	126.59	67	5.17	90	886.851	241	68.6238	4.5	26	0	45.1	38.1	1.02	67	163	0		1.11	5.5	2.46992	33.6	32.2	70	4	8.34663	0	109	0
203	Control	9.1	7.65	4.75	4.1	6.84	9.86	5.7	13.6	1.8	1.60935	1.62708	21.94	18.3638	0.0661017	12	90.3333	21.0526	8.1	9.9	32.6505	134.1	71	4.98	73	616.122	258	7.46318	5.3	34	0	39.9	35.7	0.45	72	190	0		1.03	2.69	2.0732	33.6	28.1	77.9	4	11.9575	0	129	0
209	Control	9.23	7.89	5.1	4.18	6.71	10.08	5.72	15	2.4	1.53743	1.55436	7.91	14.9257	0.0221611	-6	79	24.2215	10.4	15.9	19.7839	82.81	66	5.52	80	467.259	297	28.0534	5.12	32	0	40.41	35.9	0.71	76	170	0	2013	2.2	5.2	2.11799	33.1	28.1	80.6	4	8.39266	0	105	0
210	Control	9.01	8.13	5.71	4.31	7.7	9.83	6.35	12.1	1.63	1.59335	1.6109	14.9	32.7875	0.161236	7	96.6667	25.2092	5.4	6.5	19.5283	83.95	83	5.12	73	427.86	195	49.4414	4.5	26	0	44.5	36.2	1.23	59	169	0		1.45	5.5	1.98361	33.4	28.5	84.2	29	9.79486	0	124	0
211	Control	9.45	7.69	6.73	6.12	6.17	10.45	7.56	14.8	1.61	1.58731	1.6048	4.98	17.965	0.0649924	14	85	16.6043	5.8	9.6	7.93435	76.81	73	5.28	67	513.399	238	40.4796	4.6	27	0	38.6	37.8	0.55	84	182	0		1.63	4.81	1.47089	28.9	28.9	82.8	41	25.4048	67	109	0
262	Control	8.32	7.17	5.54	4.07	6.01	9.8	5.68	11.8	0.95	1.61253	1.6303	11.82	19.1314	0.0789212	7	78	25.6544	5.4	8.4	14.2282	124.2	63	4.17	71	469.746	234	59.0396	5	31	0	39.1	40.9	0.9	82	164	8.30921		1.53	5.15	1.49063	30.1	27.6	83.9	7	2.82339	0	108	0
212	Control	10.65	9.7	5.7	4.18	7.18	11.31	6.19	11.2	1.1	1.59439	1.61195	52.43	14.4658	0.0906805	8	83.6667	20.4152	7.3	8.1	47.9517	107.66	69	4.01	123	885.236	192	54.4549	4.2	22	0	41.6	45.8	0.42	66	170	10.321		1.74	4.34	1.80653	28.7	23.9	80.3	5	7.22784	0	113	0
251	Control	10.21	8.36	4.9	3.87	7.29	11.1	5.93	12.6	2.15	1.55822	1.57539	14.31	23.9617	0.0721732	-16	80.3333	19.8141	8.8	8.9	23.5245	135.34	66	4.37	85	676.527	274	40.0788	5.1	32	0	40.05	45.1	0.52	80	162	10.4387		1.37	4.48	3.39094	31.2	26.7	81.2	91	2.58685	64	109	0
252	Control	8.45	7.02	4.12	EEE	5.91	9.2	5.1	12.2	1.23	1.60412	1.62179	19.28	34.7509	0.0522701	12	82	18.6122	9.1	10.6	10.2455	78.9	65	4.94	85	428.422	0	44.8923	4.8	29	0	43.1	42.1	0.6	80	175	0		2.69	6.93	5.80952	32.2	29.05	84.2	5	3.73385	0	116	0
215	Control	9.42	8.51	4.6	4	6.1	11.2	5.73	10.6	1.54	1.56678	1.58404	13.24	25.0711	0.0832593	29	78	18.5568	7.6	8.2	8.9816	106.35	61	4.84	95	695.764	216	56.1047	0	0	0	45.7	39.9	0.55	54	169	9.29904		1.18	3.81	3.33665	33.2	29.2	68.9	7	1.90587	0	112	0
216	Control	8.16	7	5.05	4.21	6.3	9.3	5.79	12.9	1.2	1.52362	1.5404	9.48	26.1424	0.0840796	9	89.3333	22.8329	8.1	8.7	6.09779	122.65	73	5.69	84	652.351	198	50.3536	6.1	43	0	39.9	38.7	0.81	67	158	9.90898	2008	1.7	4.62	4.11158	32.1	30.15	66.8	26	5.01002	0	122	0
217	Control	8.53	7.4	4.52	3.89	6.5	9	5.5	14.2	1.1	1.57018	1.58748	9.62	23.8287	0.0482357	7	84.6667	25.9645	9.1	11.2	23.372	146.58	68	4.58	90	854.919	274	55.9904	5.2	33	0	41.2	35.76	0.41	80	157	8.50182		1.33	5	1.80531	29.8	34.2	87.8	9	1.20552	0	118	0
218	Control	7.53	7.1	4.23	3.45	6.2	8.43	5.1	12.7	1.23	1.60198	1.61963	21.36	22.4674	0.107995	-12	82.6667	28.6215	7	7.4	13.2907	112.41	66	5.15	95	655.544	217	50.3442	5.3	34	0	40.04	42.8	0.44	70	153	0		1.96	5.77	2.30325	30.5	30.15	77.5	13	6.04308	0	116	0
222	Control	8.1	7.35	4.19	3.9	6.53	8.95	5.43	14.8	1	1.59742	1.61502	13.2	14.7436	0.150055	21	88.6667	20.9042	5.8	6.5	5.31755	112.03	71	5.26	99	572.52	261	49.5526	5.1	32	0	40.9	37.7	0.43	78	168	8.63416		0.65	6.98	2.66035	28.9	24.5	78.3	13	3.24272	0	124	0
268	Control	9.32	8.18	5.99	4.07	7.17	10.5	6.33	13.5	0.67	1.57511	1.59246	17.86	13.1091	0.11721	9	88	24.2424	6.8	7.2	11.686	116.91	81	4.53	85	458.477	233	35.0403	0	0	0	40.88	44.5	0.49	138	165	9.29529		1.24	6.6	1.87474	32.7	29.4	84.3	11	4.71814	0	102	0
271	Control	8.67	8.1	4.15	3.5	5.85	9.54	4.77	11.1	2.3	1.47853	1.49482	13.62	8.59891	0.0565866	5	109.333	22.6474	9.6	11.6	5.48745	122.47	98	5.14	102	606.511	189	49.7137	6.4	46	0	40.39	44.19	1.88	95	172	0		0.46	4.76	2.36078	28.89	29.01	89.45	45	20.5922	0	132	0
269	Control	8.39	7.19	4.04	3.58	6.5	9.19	4.97	11.1	0.95	1.58636	1.60383	16.36	13.7308	0.0408141	-2	70.6667	24.4898	4.9	11.2	8.58044	137.62	51	3.78	114	475.544	225	43.943	5.3	34	0	38.1	42.1	0.35	66	175	0		1.6	5.99	2.06726	31.01	29.8	84.9	5	5.9421	0	110	0
274	Control	10.67	8.67	5.67	5.02	7.56	12.01	6.12	13.7	2.11	1.58098	1.59839	8.14	18.4232	0.177217	-8	96.6667	30.4867	5.8	6.2	9.9858	118.79	83	4.86	95	497.582	249	41.9998	5.1	32	0	40.1	34.89	0.46	74	165	8.51345		1.81	4.07	2.26723	34.4	27.17	82.2	7	6.99057	0	124	0
272	Control	9.76	9.02	5.98	4.11	8.14	11.4	6.65	11.3	0.95	1.58107	1.59849	14.03	13.573	0.0318792	7	78.6667	19.8347	6.6	13.2	7.10984	115.7	67	4.06	87	317.754	207	33.6922	0	0	0	39.2	43.8	0.74	62	165	0		1.21	4.7	1.66731	34.6	26.1	79.3	6.5	5.70055	0	102	0
276	Control	8.52	7.03	5.14	4.19	6.49	10.8	5.81	11.9	1.12	1.55957	1.57675	12.6	8.27236	0.103408	10	103.333	20.5693	7.9	8.4	15.6903	141.53	88	4.34	97	458.115	201	36.7392	5	31	0	42.3	40.12	0.31	75	165	0		1.18	6	2.26723	30.8	29.1	80.4	9	7.40801	0	134	0
231	Control	9.59	8.48	5.11	4.38	7.83	10.7	7.01	12	1.57	1.56719	1.58445	15.16	21.9383	0.0800555	-15	79.3333	19.0039	6.5	8.4	10.9633	102.74	65	4.67	75	817.882	255	17.3808	5	31	0	40.26	40.19	0.57	70	167	0		1.14	6.49	2.0668	32.66	33.4	84.4	4	11.4771	0	108	0
230	Control	7.57	7.2	4.17	3.78	5.81	8.19	5.13	13.5	1.8	1.54957	1.56664	8.02	27.6772	0.0305079	6	89	28.6501	13.6	14.3	10.4958	96.16	78	5.02	101	771.259	211	69.0067	5.7	39	0	37.18	38.3	0.54	68	165	7.69287		1.75	4.4	5.90052	29.7	28.8	77.5	14	7.78005	0	111	0
227	Control	8.1	6.45	4.69	3.98	5.85	10.8	5.11	11.07	1.46	1.55792	1.57508	13.37	16.256	0.0270145	5	90.3333	27.3438	9.15	15.1	12.9922	106.03	86	5.21	173	780.367	398	60.6176	5.7	39	0	40.4	45.3	0.58	71	160	8.48414	2008	1.8	3.99	3.07232	25.1	31.9	87.61	15	9.68485	0	99	0
229	Control	8	7.01	4.13	3.69	6.82	8.89	5.32	12.1	1.3	1.63499	1.653	11.43	14.8984	0.0563822	12	93.3333	25.8546	8.6	10.9	9.25025	165.72	73	4.25	91	646.957	250	48.094	5.7	39	0	40.1	39.12	0.37	74	177	0		0.48	5.4	1.99641	28.1	27.8	79.1	71	8.4263	0	134	0
302	Control	9.23	8.11	5.1	4.78	7	10.4	6.14	13.4	1.6	1.56045	1.57763	12.32	4.97706	0.0887331	6	83.6667	23.4493	7.3	8.2	6.27016	173.22	68	3.91	102	504.59	215	66.3688	4.6	27	0	40.97	38.6	1.03	78	187	0		1.13	3.96	2.86024	28	29.9	95.1	9	16.3521	0	115	0
303	Control	9.93	9.1	5.01	4.51	7.94	10.8	6.73	15.4	1.71	1.58981	1.60732	2.3	52.4306	0.0440557	6	85.6667	26.4721	10.6	11.8	29.1167	98.85	68	5.9	108	556.129	225	13.4562	5.2	33	0	39.91	36.2	0.94	89	176	0		1.2	4.56	4.07209	26.7	35.3	84.7	10	12.0907	0	121	0
299	Control	9.56	7.83	4.94	4.2	6.95	10.5	5.9	13.4	0.85	1.57879	1.59618	15.52	27.6958	0.0330005	10	73.3333	19.1516	10.7	12.6	38.0723	115.08	59	4.92	56	609.626	214	44.3957	0	0	0	45.02	37.8	0.72	57	177	0		0.87	3.41	2.72587	28.6	29.6	78.9	36.2	15.0572	0	102	0
300	Control	9.26	7.61	4.25	3.91	5.92	10.56	5.01	13.21	1.19	1.61547	1.63326	12.02	13.236	0.0750449	-12	85	26.4463	7.2	9	12.4793	87.05	68	3.79	92	400.431	282	46.4007	5.4	36	0	41.02	42.1	0.45	99	165	13.6757		1.02	5.7	1.71275	30.1	28.9	63	10	144.379	0	119	0
301	Control	8.18	7.73	3.84	3.7	6.17	9.6	5.4	12.5	1.18	1.62357	1.64146	17.97	9.47693	0.0442627	23	83	23.8087	9.8	11.6	11.267	108.79	65	4.16	105	666.206	0	39.2438	5.9	41	0	36.8	40.12	1.23	68	169	10.0267		1.08	4.71	1.79172	32.2	27	87.6	8.2	1.64945	0	119	0
213	SCT	8.14	7.21	3.94	3.01	5.82	9.6	4.84	13.4	1.1	1.5517	1.56879	27.7	13.3677	0.0662083	7	101.333	23.9869	9.6	10.4	9.01331	82.87	86	3.87	80	609.346	228	31.327	5.4	36		37.25	38.8	1.32	88	178	0		1.84	5.2	1.42242	34.5	27.2	78.4	36	5.83231	0	132	0
179	SCT	9.48	8.24	4.77	4.29	7.4	10.2	6.14	12.8	0.72	1.54821	1.56526	25.07	14.8711	0.054566	13	92	27.2173	10.1	11	15.0092	76.73	72	3.98	73	623.715	221	34.1092	5.1	32		40.48	32.9	0.63	81	166	0		2.17	6.38	2.89863	32.2	21.9	69.32	128	9.01021	0	132	0
188	SCT	9.2	7.81	5.43	4.72	6.99	10.14	6.1	14.52	1.67	1.48346	1.4998	13.11	17.86	0.0742535	-23	88	20.2449	7.3	9.1	15.4492	81.82	78	5.1	105	747.843	202	47.3636	5.4	36		43.1	38.2	0.98	86	175	8.8603	2010	0.56	5.3	1.88057	35.3	29.8	69.9	182	2.36302	0	108	0
198	SCT	9.65	9.05	5.89	5.14	8.56	11.34	6.78	11.7	1.98	0	0	13.57	12.0198	0.0590239	11	81.3333	13.5853	6.8	9.9	9.93789	112.69	67	6.1	56	810.502	289	65.3463	5.7	39		44.52	32.2	0.54	68	182	0		1.2	6.41	2.10809	35.1	27.8	84.4	7	9.72576	0	110	0
169	SCT	12.1	10.54	5.22	4.31	8.45	13.4	6.6	15.2	1.3	0	0	19.13	15.1612	0.0401861	2	96.6667	24.4473	10.9	13	4.13756	56.87	84	6.02	104	373.991	198	69.3209	5.2	33	21	44.3	35	0.62	67	168	0	2009	2.35	4.12	1.90364	33.7	28.3	77.2	92	8.17485	0	122	0
193	SCT	9.58	8.85	5.39	4.51	7.13	10.04	6.11	10.08	1.16	1.54821	1.56526	41.19	12.6043	0.109514	-30	96	21.7079	6.9	7.8	15.8394	92.11	87	5	189	275.521	213	36.4698	5.2	33	33	36.63	39.7	0.58	76	169	8.29316	2016	0.94	4.3	1.59105	35.5	28.5	76.1	66	5.67411	0	114	0
204	SCT	8	7.5	4.6	3.77	6.1	9.4	5.01	13.23	1.75	1.57352	1.59086	27.68	8.13585	0.0718338	-4	80.6667	23.3011	7.9	8.9	12.932	102.21	69	4.1	78	455.149	245	75.7198	5.2	33	34	35.83	38.9	0.23	94	177	0	2010	2.05	4.1	1.36724	34.7	26.9	70.9	41	6.19932	0	104	0
246	SCT	11.63	10.87	5.55	4.73	8.43	12.4	6.12	10.3	0.72	582.739	0	17.37	2.30468	0.133108	10	96	27.8159	5.2	7.1	11.0117	77.26	85	4.2	73	7.63599	242	0	4.9	30	18.1	42.14	37.91	0.61	80	162	118	2014	0.52	5.1	14.1934	28.9	27.1	92.8	9.94	0	0	85	0
191	SCT	8.29	7.68	5.61	4.12	7.1	9.74	6.42	14.6	1.29	1.56198	1.57918	8.6	13.6184	0.083344	9	87.3333	21.83	6.9	8.7	19.6403	77.26	65	3.12	93	596.171	233	52.8408	0	0	20.4	38.01	37.8	0.74	71	163	9.57726	2016	1.3	4.8	1.45115	35.7	26.8	69.6	45.3	1.03091	0	132	0
205	SCT	8.28	7.94	4.43	3.92	6.61	9.12	5.89	12.2	1.15	1.57668	1.59405	18.1	24.4574	0.113185	7	78.6667	25.0298	8.9	7.1	8.83969	112.33	56	3.98	109	990.75	269	67.5969	5.5	37	21.1	38.9	39.2	1.84	79	181	9.29529	2016	1.45	5.12	0	35.5	30.2	69.1	25	9.96484	0	124	0
199	SCT	11.56	10.23	6.17	5.1	9.54	12.32	8.21	12.1	2.01	0	0	8.27	15.5177	0.0749654	-9	102	23.1405	8.2	9.8	24.5431	129.55	87	5.3	67	729.579	234	38.2126	5.4	36	22.3	40.02	34.9	0.74	82	165	0	2015	0.29	5.4	2.96101	34.1	27.4	74.2	104	16.9502	73	132	0
100	SCT	8.4	9.81	4.62	4.05	8.76	8.75	7.13	13.2	2.08	1.48832	1.50471	20.07	9.61639	0.0523448	2	82.6667	26.7949	8.8	10.6	10.2558	133.77	68	5.9	92	458.381	226	54.3745	5	31	23.4	39.83	35.5	0.89	60	176	9.43815		1.2	4.8	2.06319	35.5	26.8	84.2	35	1.81564	0	112	0
166	SCT	8.19	7.69	4.26	3.23	6.76	11.03	5.1	12.2	1.85	1.53675	1.55368	32.79	20.8137	0.0613738	3	88.3333	18.3655	10.1	10.1	13.3539	71.3	74	4.49	101	737.977	238	49.2786	6	42	25.3	38.98	42.5	0.68	74	165	0		1.54	4.63	3.1736	32.1	25.1	77.5	24.25	13.1519	0	117	0
194	SCT	11.2	9.44	5.02	4.54	8.12	12.21	5.89	16.8	1.42	1.49438	1.51084	13.73	14.0259	0.0697307	15	92.6667	22.3081	8.2	9.7	12.7621	100.43	78	6.1	92	198.354	229	33.7125	5.8	40	27.2	40.3	32.1	0.8	68	164	8.06844	2017	0.63	5.2	1.49557	34.6	29.4	85.4	96	9.50141	0	122	0
291	SCT	9.23	8.1	5.32	4.78	7.12	10.45	6.1	13.4	1.2	1.64056	1.65863	39.11	39.1125	0.102279	8	96	22.7732	7.8	8.2	19.3652	60.56	76	4.76	92	571.998	132	63.3945	5.12	32	28.1	40.1	38.8	0.49	61	165	9.23483		0.9	4.37	2.39953	35.3	28.2	79.8	101	23.6972	0	136	0
283	SCT	8.1	6.89	4.62	4.29	6.01	10.1	5.09	13.9	1.09	1.61937	1.6372	24.46	18.0966	0.0299249	14	92.6667	24.8591	12.7	14.9	11.6741	92.55	73	4.6	70	618.175	210	73.8909	5.2	33	28.3	38.7	40.1	0.33	70	169	12.2011		1.32	4.49	1.03623	31.56	28.1	85.2	15	4.26338	0	132	0
173	SCT	8.1	7.16	4.2	3.89	5.47	8.76	4.8	16.2	1.09	0	0	14.47	17.3669	0.0390279	8	92	22.1158	8.1	12.8	5.94283	140.76	83	5.5	104	633.038	139	37.9317	4.3	23	28.5	38.56	32.2	1.02	78	189	0		0.56	4.42	2.00526	34.8	27.9	75.2	46	10.4623	87	110	0
101	SCT	9.86	8.8	5.24	EEE	7	10.18	6.21	10.06	1.52	1.61744	1.63526	8.97	21.3627	0.0372798	-10	65.3333	26.6728	9.6	11.3	11.0039	60.77	42	4.3	123	518.379	163	69.3041	5	31	29.1	41.3	36.3	0.56	74	162	8.66769		1.32	6.1	1.46102	32.4	22.7	77.19	12	2.61808	0	112	0
177	SCT	9.1	8.41	5.23	4.44	7.13	9.91	6.57	10.93	1.78	1.49939	1.5159	34.75	15.7771	0.0680275	9	83.6667	22.1297	6.4	9.4	6.63451	109.99	65	4.2	56	361.506	214	42.0639	5.1	32	29.4	43.12	41.6	1.1	68	174	0	2010	2.1	6.3	2.26516	34.1	28.7	82.4	101	5.74516	0	121	0
270	SCT	10.4	8.64	5.34	4.13	7.84	11.5	6	14.1	2.15	1.54877	1.56583	25.94	41.1924	0.165602	5	86	23.9395	5.9	6.1	15.0617	129.76	68	4.95	88	749.971	274	59.282	5	31	29.6	43.4	40.05	0.38	62	177	0		1.36	5.23	2.81781	28.9	29.21	80.2	90	12.3365	0	122	0
184	SCT	7.48	6.9	3.87	3.31	5.89	8.18	4.91	15.03	1.59	1.46713	1.48329	22.47	16.3597	0.107739	-22	95.6667	23.4075	8.1	7.9	11.4217	131.24	83	4.1	98	557.033	201	51.0768	4.9	30	29.7	40.01	39.9	1.23	62	179	8.18615	2016	2.15	5.1	1.58935	31.8	24.7	90.1	10	8.37239	0	121	0
197	SCT	9.35	8.55	4.82	4.01	6.76	10.83	5.23	11.56	1.11	0	0	18.42	12.3206	0.0770714	-18	84.6667	22.231	7.7	8.9	9.77934	85.21	64	3.8	110	632.236	264	41.6886	5.4	36	29.8	36.4	40.1	0.57	73	167	0	2013	0.66	6.3	1.49109	34.2	28.2	77.6	196	4.69866	0	126	0
181	SCT	11.21	8.41	4.34	3.83	6.81	12.7	5.81	12.3	1.28	1.59868	1.61629	26.14	14.3137	0.0583863	-18	83	26.4463	7.8	10.1	13.3254	80.95	65	5.1	103	669.499	231	29.8784	7.1	54	30.6	38.64	38	0.7	94	165	0		0.42	5.8	1.60909	33.9	22.7	86.7	72	33.5132	0	119	0
224	SCT	8.33	7.21	5.09	4.89	6.2	12.13	5.81	12.3	1.76	1.60205	1.6197	20.81	11.8193	0.325115	8	109.667	29.3878	4.6	4.9	8.16299	76.54	90	3.9	103	719.67	151	38.054	5.5	37	30.8	39.15	34.8	0.71	68	175	6.95534		1.57	5.11	1.46214	35.1	27.2	86	46	15.5967	0	149	0
167	SCT	8.17	7.6	5.01	4.62	6.37	9.3	5.67	10.04	2.01	1.58222	1.59964	17.96	11.425	0.0904089	-11	92.3333	23.7654	7.9	8.5	3.05385	65.46	78	6.02	102	443.198	229	42.597	5.3	34	31.3	38.19	43.7	0.7	89	180	0		1.36	4.2	1.55931	33.9	28	73.2	104	7.90831	0	121	0
168	SCT	8.91	6.24	4.1	3.63	5.81	10.1	4.73	14.1	1.65	0	0	12.53	8.0183	0.18755	-5	94	23.03	5.1	5.9	4.82687	70.93	85	5.17	78	376.072	218	33.8071	5.3	34	31.7	40.32	39.7	0.34	82	168	0	2008	0.5	5.1	1.966	34.3	29.4	82.1	48	20.9244	0	112	0
223	SCT	9.83	8.94	4.59	4.01	6.33	10.67	5.82	10.67	1.13	1.5703	1.5876	13.02	25.9449	0.122807	-4	100.333	22.4712	6.5	7.6	14.7192	76.77	85	4.8	98	650.486	173	44.8844	5.4	36	32.2	39.39	38.1	0.72	88	179	0		2.2	8.1	1.41659	30.9	28.9	65.8	36.71	2.50663	0	131	0
256	SCT	10.12	8.65	5.21	4.54	7.25	11.72	5.83	13.6	1.82	1.58511	1.60257	10.47	12.5324	0.131708	-6	82	28.3447	6.1	6.7	7.31528	66.4	62	4.63	64	448.22	201	44.727	5.5	37	32.3	39.89	40.4	0.57	87	168	8.00958		1.33	5.19	1.71768	32.1	29	85.7	9	3.94694	0	122	0
187	SCT	8.94	8.03	4.8	4.1	7.45	10.5	6.31	9.3	1.4	1.59141	1.60894	14.74	10.4743	0.0557959	20	93	25.42	8.9	10.8	9.86735	78.08	82	4.34	110	590.713	184	74.5714	4.1	21	32.4	35.82	41.2	0.87	68	185	0		2.14	4.2	1.6239	35.9	28.1	90.1	98	1.38187	0	115	0
248	SCT	8.27	7.34	4.67	3.89	6.18	9.98	5.38	11.2	0.76	0	0	19.43	17.9685	0.127035	21	85.6667	31.2175	7.9	6.9	16.8944	69.29	73	4.44	89	547.255	180	42.5678	5.1	32	32.6	40.18	40.2	0.82	64	155	0		1.15	5.23	2.5527	32.1	23.4	88.2	23.56	15.8993	0	111	0
182	SCT	7.2	6.38	3.92	EEE	5.51	8.25	4.88	10.89	1.14	1.56817	1.58544	23.83	19.2835	0.0947266	15	99.3333	20.148	7.1	8.6	17.308	126.79	85	4.1	89	1094.99	239	54.5954	6	42	33.7	38.98	40.2	0.98	75	174	0		0.56	4.1	1.6239	35.3	31	84.4	87	3.24605	0	128	0
174	SCT	8.56	7.02	5.2	4.7	6.25	10.6	5.79	10.98	2.01	0	0	23.96	19.4334	0.0707918	-8	100.333	26.449	9.6	10.01	17.2987	80.83	85	6.1	81	419.676	204	41.3915	6.3	45	34.1	40.01	35.5	0.93	72	175	7.88336		0.63	6.2	2.09879	35.5	28.8	78.3	29	12.0716	0	131	0
165	SCT	9.4	8.17	4.67	4.1	6.12	10.3	5.11	11.21	1.4	1.55777	1.57493	14.93	13.0211	0.0673413	32	93.3333	24.7555	6.5	9.8	12.7684	75.99	85	4.32	105	753.124	183	39.5321	5.3	34	34.5	37.19	44.4	0.47	67	182	7.95823		0.29	5.8	2.24969	33.8	27.2	79.1	27	1.61432	0	110	0
161	SCT	7.3	6.54	4.11	3.73	5.9	8.19	4.85	15.4	1.29	1.48188	1.4982	18.36	13.198	0.0836121	5	89.3333	20.8209	8.1	8.7	13.0932	74.72	75	5.19	102	534.162	225	20.3005	5.4	36	38.9	40.9	38.8	1.4	80	164	7.45849	2010	0.93	5.3	3.76607	35.1	27.3	79.9	83	7.12379	0	118	0
[truncated: 80 more columns]

## Sheet: Sheet1
Significance (Wilcoxon and FDR correction for multiple hypothesis testing)
	V	p.value	Transformed p (-LOG10(p))	FDR
Score	972	5.3353e-10	9.2728	6.7758e-08
HbS	66	2.4203e-09	8.6161	1.5369e-07
CKD-EPI DFG estimation mL/min/1,73m2 CKD-EPI	859	7.1891e-07	6.1433	2.7016e-05
Microalbuminuria mg/L	163	8.5088e-07	6.0701	2.7016e-05
AGEs umol/L	816	1.9464e-05	4.7108	0.0004944
AMP	209	2.7431e-05	4.5618	0.00058062
ADP	229	0.0001004	3.9982	0.0018216
Malondialdehyde MDA umol/L	787	0.00012838	3.8915	0.001925
AGE ajusted cohort Mor	786	0.00013642	3.8651	0.001925
MCHV pg	781	0.00018409	3.735	0.002338
Hct - HmG	775	0.00026146	3.5826	0.0030187
Phosphoethanolamine	250	0.00034774	3.4587	0.0036803
MCV 3	760	0.0006035	3.2193	0.0054746
Rapport Hct/visco 225 S-1	760	0.0006035	3.2193	0.0054746
Ascorbate	264	0.00074718	3.1266	0.0063261
Hct	753	0.00087474	3.0581	0.0069433
Platelets 10 9/L	735	0.002154	2.6668	0.016092
225 S-1 mPas-1	729	0.0028612	2.5434	0.020188
Hb g/100 ml	726	0.0032878	2.4831	0.020878
L-cysteine	726	0.0032878	2.4831	0.020878
PAD mmHg repos 1	725	0.0039013	2.4088	0.022786
Uremia pos >8,33mmol/L	724	0.0040714	2.3903	0.022786
Fructosamine umol/L	721	0.0041266	2.3844	0.022786
90 S-1 mPas-1	715	0.0053818	2.2691	0.028479
erythrocytes Millions/mm3	715	0.0059366	2.2265	0.029935
Triglycerides mmol/l	712	0.0061284	2.2126	0.029935
Malate	309	0.006397	2.194	0.03009
11.25 S-1 mPas-1	710	0.0066759	2.1755	0.03028
5.62 S-1 mPas-1	710.5	0.0071298	2.1469	0.031223
N-Acetylneuramite	313	0.0075783	2.1204	0.032081
Height cm	702	0.0093228	2.0305	0.038193
2-Oxoglutarate	320	0.010114	1.9951	0.038675
Carotid-femoral PWV	699	0.010531	1.9775	0.038675
375 S-1mPas-1	698	0.010963	1.9601	0.038675
(R)-S-Lactoylglutathione	322	0.010963	1.9601	0.038675
S-lactoylglutathione	322	0.010963	1.9601	0.038675
sn-glycero-3-Phosphoethanolamine	323	0.011411	1.9427	0.039166
L-cystine	696	0.011874	1.9254	0.039684
AOPP Advanced Oxidation Protein Products umol/L	692	0.013896	1.8571	0.04412
2-3-Dinor-8-iso prostaglandin F2alpha	328	0.013896	1.8571	0.04412
45 S-1 mPas-1	691	0.014446	1.8402	0.044748
PAS mmHg repos 1	688	0.016211	1.7902	0.047879
D-Glucosamine	688	0.016211	1.7902	0.047879
Fumarate	334	0.017489	1.7572	0.048048
Indoxyl	334	0.017489	1.7572	0.048048
Fasting Blood Glucose mg/dL	687	0.01757	1.7552	0.048048
2/3-Phospho-D-glycerate	335	0.01816	1.7409	0.048048
2-Hydroxyglutarate	335	0.01816	1.7409	0.048048
2-3-Bisphosphoglycerate	676	0.025262	1.5975	0.063942
22.5 S-1 mPas-1	676	0.025976	1.5854	0.063942
Adenine	675	0.026181	1.582	0.063942
L-1-Pyrroline-3-hydroxy-5-carboxylate	345	0.026181	1.582	0.063942
Succite	346	0.027128	1.5666	0.065005
BMI	672	0.029799	1.5258	0.06961
Biliverdin	349	0.030146	1.5208	0.06961
Heart Rate	670	0.031213	1.5057	0.070787
Systolic BP	668	0.033443	1.4757	0.074514
Diphosphate	354	0.035806	1.446	0.075857
Prostaglandin F2alpha/beta/D1 (isobars)	354	0.035806	1.446	0.075857
Lactate	353.5	0.035838	1.4457	0.075857
Average BP	663	0.039612	1.4022	0.081141
Dehydroascorbate	357	0.039612	1.4022	0.081141
Itacote	358	0.040954	1.3877	0.081268
Kynurenic acid	358	0.040954	1.3877	0.081268
AOPP Advanced Oxidation Protein Products ?mol/L	360	0.043751	1.359	0.085483
Octadecanoic acid	362	0.046706	1.3306	0.088531
HPETE/Leukotriene B4 (isobars)	362	0.046706	1.3306	0.088531
Carotid radial PWV	655	0.051446	1.2887	0.096082
Sphingosine	366	0.053111	1.2748	0.097755
Pantothenate	367	0.054821	1.2611	0.099461
Octanoic acid (caprylate)	372	0.06406	1.1934	0.11459
LDL- cholesterol mmol/l	647	0.066052	1.1801	0.11651
Leucocytes /mm3x1000	646	0.068299	1.1656	0.11882
FRAP umol/L	644	0.072331	1.1407	0.12087
HbA1C	644	0.072331	1.1407	0.12087
Palmitoylcarnitine	376	0.072331	1.1407	0.12087
Citrate	379	0.079084	1.1019	0.13044
Diastolic BP	638.5	0.085058	1.0703	0.13849
Pyruvate	385	0.094099	1.0264	0.15127
L-tryptophan	387	0.099577	1.0018	0.15808
GPX umol/L	632	0.10241	0.98967	0.15861
Ornithine	388	0.10241	0.98967	0.15861
Phosphoenolpyruvate	627	0.11752	0.92988	0.17982
375 S-1mPas-1.1	625	0.12403	0.90647	0.18752
IL-1b ng/mL	622	0.13358	0.87426	0.19959
Sphingosine 1-phosphate	399	0.13787	0.86052	0.2036
Stage of CKD	401	0.14435	0.84058	0.21072
Hexadecanoic acid	406	0.16487	0.78285	0.23794
SOD umol/L	613	0.16903	0.77203	0.2412
Weight kg	610	0.18197	0.74	0.25678
Indole	411	0.18644	0.72947	0.25863
Heptadecanoyl carnitine	411.5	0.18735	0.72734	0.25863
Bilirubin	414	0.20032	0.69827	0.27356
Eicosatetraenoic acid	416	0.20999	0.67781	0.2837
Prostaglandin A2/B2	417	0.21494	0.66768	0.28734
(S)(+)-Allantoin	418	0.21998	0.65763	0.29101
MCHC g/dl	600.5	0.22596	0.64596	0.29585
Propiote	421	0.23558	0.62786	0.3053
Augmentation Index	597	0.24641	0.60835	0.30984
Uremia mmol/L	597	0.24641	0.60835	0.30984
Uricemie mg/l	597	0.24641	0.60835	0.30984
Tetradecanoic acid	425	0.25757	0.58911	0.3207
Catalase umol/L	594	0.26328	0.57959	0.32256
Tiglylcarnitine	426.5	0.26414	0.57816	0.32256
Hydroxyhexadecanoyl carnitine	427	0.26699	0.5735	0.32294
Stearoylcarnitine	428	0.27495	0.56074	0.32942
Phosphate	433	0.30339	0.51801	0.36009
Hydroxyhexadecenoylcarnitine	433.5	0.30656	0.51349	0.36049
Nitrotyrosine umol/L	584	0.3251	0.48799	0.37878
HbA1C mmol/mol	581	0.34532	0.46178	0.39869
Asymmetric dimethyl arginine	444	0.38075	0.41936	0.43563
Butyrylcarnitine	445	0.38809	0.41107	0.44007
D-Rhamnose	447	0.40302	0.39467	0.45295
Phosphocreatine	451	0.43389	0.36262	0.48337
HETE	459	0.49949	0.30147	0.55161
Prostaglandin D2/Thromboxane A2 (isobars)	559	0.51667	0.28679	0.56566
(8Z-11Z-14Z)-Icosatrienoic acid	466	0.56089	0.25112	0.60883
Hydroxyoctadecenoylcarnitine	469.5	0.59046	0.22881	0.6355
Hexadecenoic acid	472	0.61622	0.21026	0.65765
UDP	483	0.72328	0.1407	0.76547
Prostaglandin E3/D3 (isobars)	484.5	0.73661	0.13276	0.77314
Maltotriose	488	0.77392	0.1113	0.80564
HDL-cholesterol mmol/l	492	0.81515	0.088763	0.84166
8-Methoxykynurete	497	0.86644	0.062262	0.88126
Total Cholesterol mmol/l	497	0.86738	0.061788	0.88126
In menopause since	500	0.8983	0.046581	0.90542
aortic distensibility	502	0.9202	0.036119	0.9202
